# Supplementary material for: Highly enhanced adsorption performance of tetracycline antibiotics on KOH-activated biochar derived from reed plants
Source: Royal Society of Chemistry journal article supplement (doi:10.1039/c9ra09208k), 2020-01-01
Supplement: c9ra09208k1.pdf [file c9ra09208k1.pdf]

## Highly enhanced adsorption performance of tetracycline antibiotics on KOH-activated biochar derived from reed plants†

Chuanqi Zhao<sup>a\*</sup>, Junguan Ma<sup>a</sup>, Ziyin Li<sup>b,c</sup>, Hui Xia<sup>a</sup>, Huan Liu<sup>a</sup>, Yuesuo Yang<sup>a</sup>

<sup>a</sup> Key Lab of Eco-restoration of Regional Contaminated Environment, Ministry of Education, Shenyang University, Shenyang 110044, China.

<sup>b</sup> Shenyang Academy of Environmental Sciences, Shenyang 110000, PR China

<sup>c</sup> Liaoning Provincial Key Laboratory for Urban Ecology, Shenyang 110000, PR China

Fax: +86-24-62267101; Tel: +86-24-62269636; E-mail: zcqs@aliyun.com

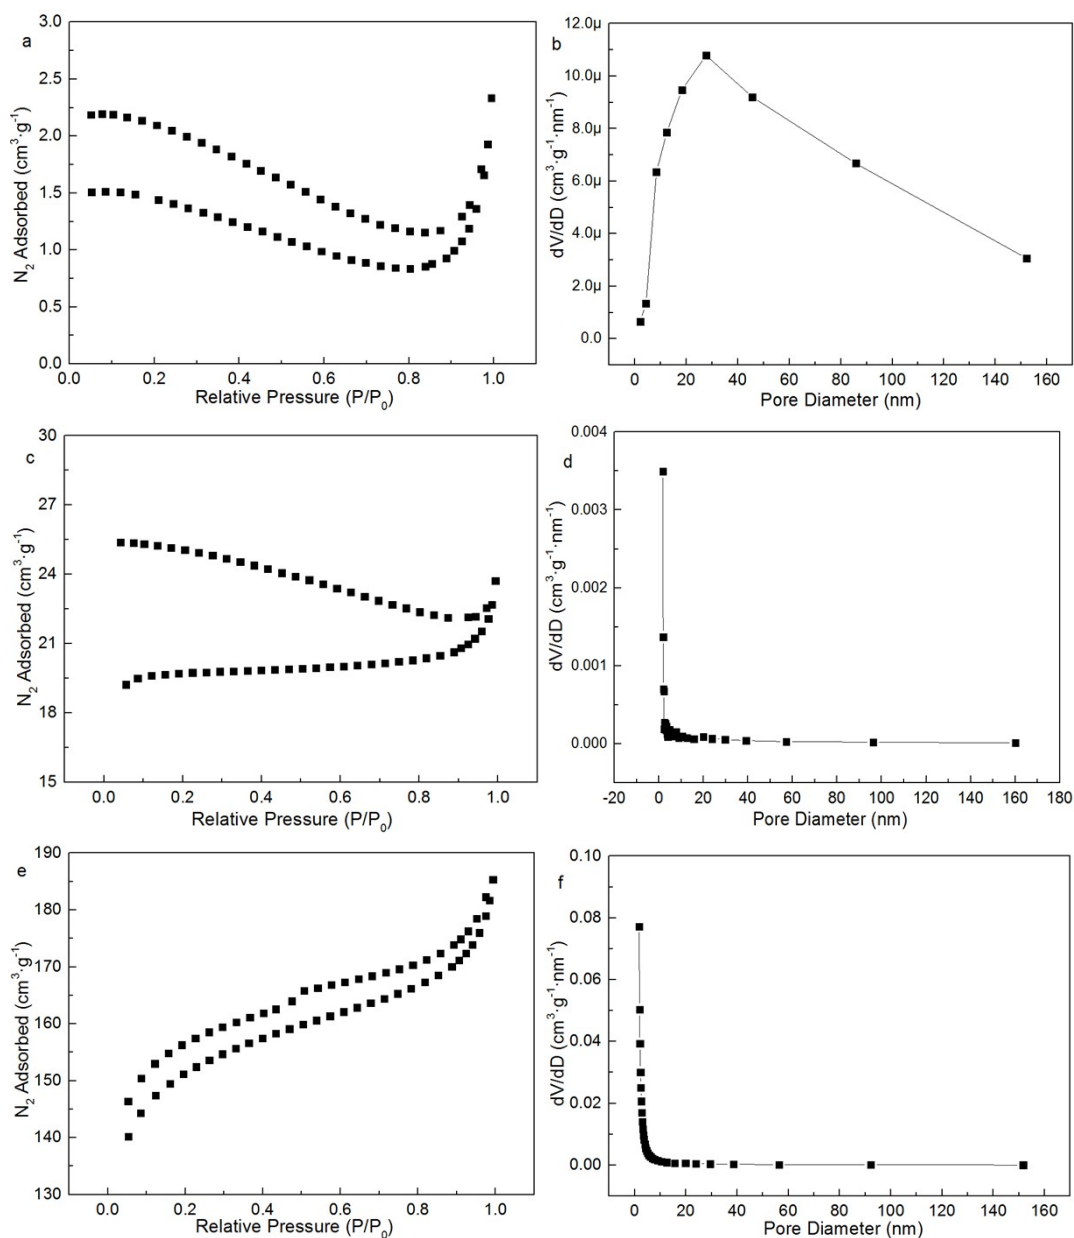

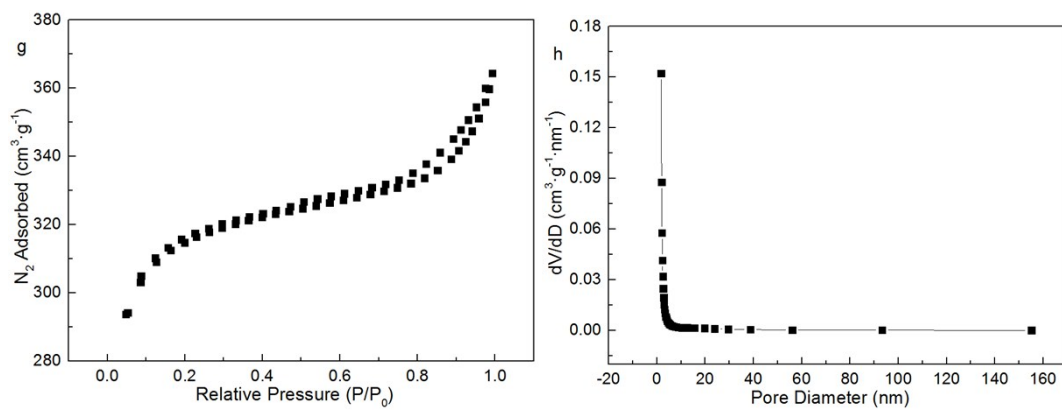

**Fig. S1** The nitrogen adsorption-desorption isotherms and corresponding pore size distribution of biochars (a, b) 450-B, (c, d) 650-B (e, f) 450-K, and (g, h) 650-K

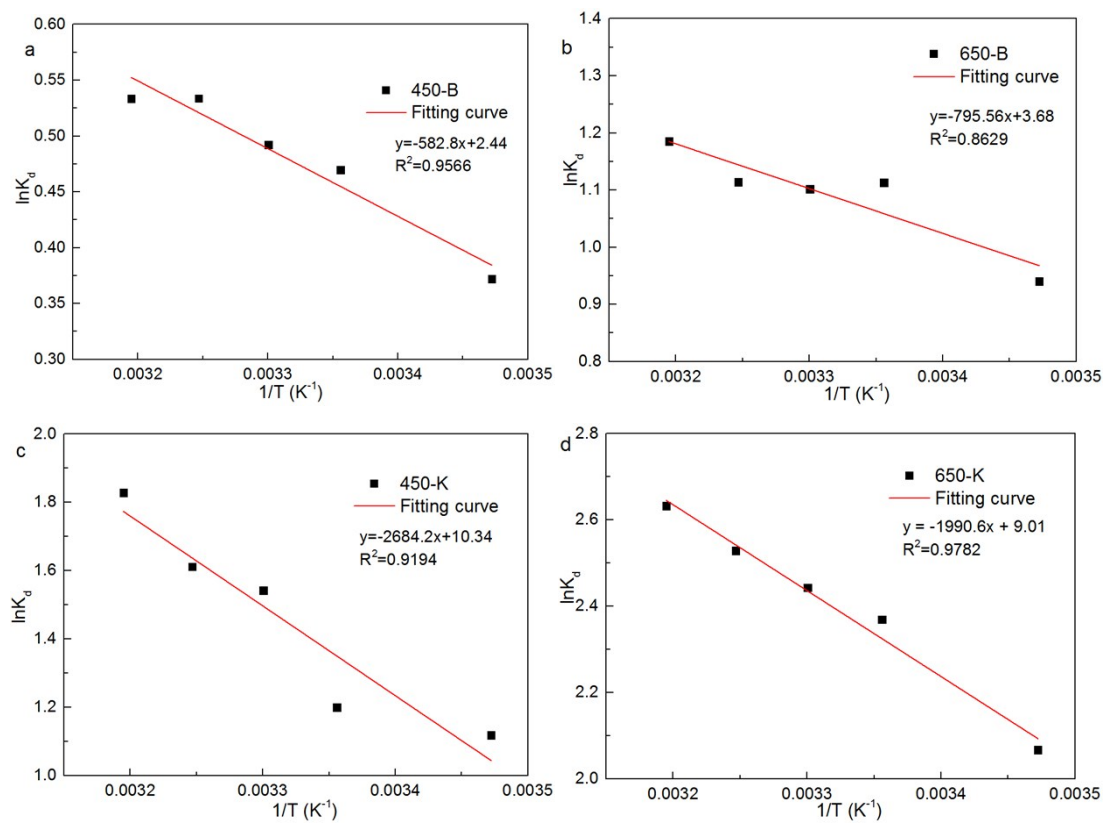

**Fig. S2** Thermodynamic parameter fitting of TC adsorption on biochars (a) 450-B, (b) 650-B, (c) 450-K, and (d) 650-K
